# Supplementary material for: A leaning amine–ketone dyad with a nonconjugated linker: solvatofluorochromism and dual fluorescence associated with intramolecular charge transfer
Source: Royal Society of Chemistry journal article supplement (doi:10.1039/c7pp00453b), 2018-07-17
Supplement: c7pp00453b1.pdf [file c7pp00453b1.pdf]

*Electronic Supplementary Information for*

**A Leaning Amine–Ketone Dyad with a Nonconjugated Linker: Solvatochromism and Dual Fluorescence Associated with Intramolecular Charge Transfer**

Yutaro Kuramoto,<sup>a</sup> Takanobu Nakagiri,<sup>a</sup> Yasunori Matsui,<sup>a,b</sup> Eisuke Ohta,<sup>a,b</sup> Takuya Ogaki,<sup>a,b</sup> and Hiroshi Ikeda<sup>a,b,\*</sup>

<sup>a</sup>Department of Applied Chemistry, Graduate School of Engineering, Osaka Prefecture University, 1-1 Gakuen-cho, Naka-ku, Sakai, Osaka 599-8531, Japan

<sup>b</sup>The Research Institute for Molecular Electronic Devices (RIMED), Osaka Prefecture University, 1-1 Gakuen-cho, Naka-ku, Sakai, Osaka 599-8531, Japan

\*Corresponding author. Phone and Fax: +81 72 254 9289, E-mail address: ikeda@chem.osakafu-u.ac.jp

**Table of Contents**

|                                                      |           |
|------------------------------------------------------|-----------|
| <b>1. Wave Deconvolution of Fluorescence Spectra</b> | <b>S1</b> |
| <b>2. Excitation Spectra</b>                         | <b>S2</b> |
| <b>3. Crystallographic Data of Dyad 4</b>            | <b>S2</b> |
| <b>4. Cyclic Voltammogram</b>                        | <b>S2</b> |
| <b>5. NMR Spectra</b>                                | <b>S3</b> |
| <b>6. Calculated Cartesian Coordinates</b>           | <b>S4</b> |
| <b>7. Results of TD-DFT Calculations</b>             | <b>S7</b> |

**1. Wave Deconvolution of Fluorescence Spectra**

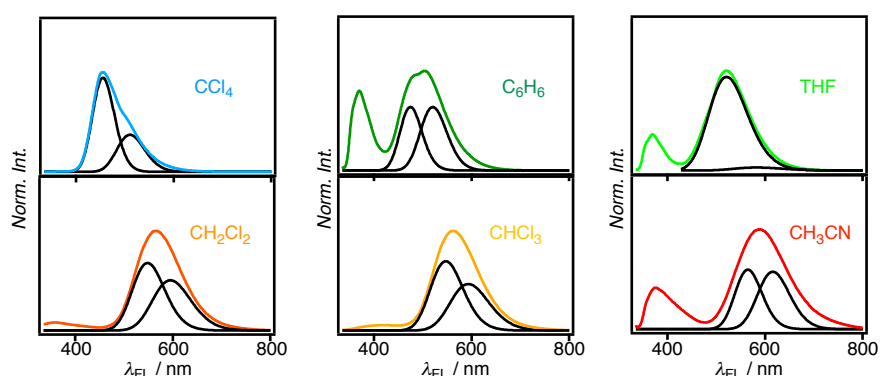

**Fig. S1** Wave deconvolution of fluorescence spectra (black line) of **4** in various solvents ( $2.5 \times 10^{-5}$  M and  $\lambda_{\text{EX}} = \lambda_{\text{AB,M}} = 300$  nm).

**Table S1**  $\lambda_{\text{ICT-FL,M}}$  and  $\nu_{\text{ss}}$  Determined by Above Fluorescence Spectra of **4** in Various Solvents

| Solvents                        | $\lambda_{\text{ICT-FL,M}}^{\text{a,b}}$ |  | $\nu_{\text{ss}}$      |
|---------------------------------|------------------------------------------|--|------------------------|
|                                 | nm                                       |  | $10^3 \text{ cm}^{-1}$ |
| CCl <sub>4</sub>                | 455, 510                                 |  | 19 <sup>c</sup>        |
| C <sub>6</sub> H <sub>6</sub>   | 475, 520                                 |  | 12 <sup>c</sup>        |
| THF                             | 519, 586                                 |  | 14 <sup>c</sup>        |
| CHCl <sub>3</sub>               | 547, 593                                 |  | 15 <sup>c</sup>        |
| CH <sub>2</sub> Cl <sub>2</sub> | 548, 595                                 |  | 15 <sup>c</sup>        |
| CH <sub>3</sub> CN              | 564, 615                                 |  | 16 <sup>c</sup>        |

(a) [4] =  $2.5 \times 10^{-5}$  M. (b)  $\lambda_{\text{EX}} = 300$  nm. (c) The value related to shorter  $\lambda_{\text{ICT-FL,M}}$ .

## 2. Excitation Spectra

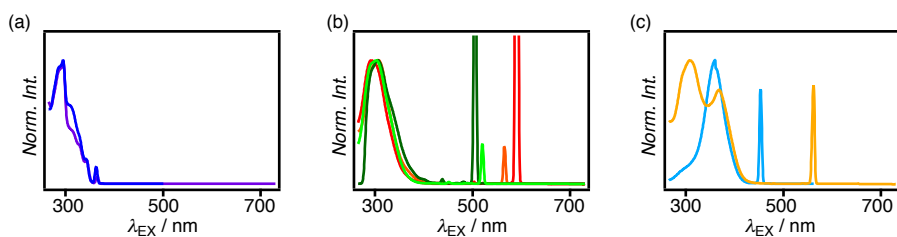

**Fig. S2** Excitation spectra of **4** in (a) saturated hydrocarbons (*c*-C<sub>6</sub>H<sub>12</sub> and *n*-C<sub>6</sub>H<sub>14</sub>), (b) aprotic solvents except for CCl<sub>4</sub> and CHCl<sub>3</sub> (C<sub>6</sub>H<sub>6</sub>, THF, CH<sub>2</sub>Cl<sub>2</sub>, and CH<sub>3</sub>CN), and (c) CCl<sub>4</sub> and CHCl<sub>3</sub> ([**4**] = 2.5 × 10<sup>-5</sup> M and λ<sub>DET</sub> = λ<sub>FL,M</sub>).

## 3. Crystallographic Data of Dyad **4**

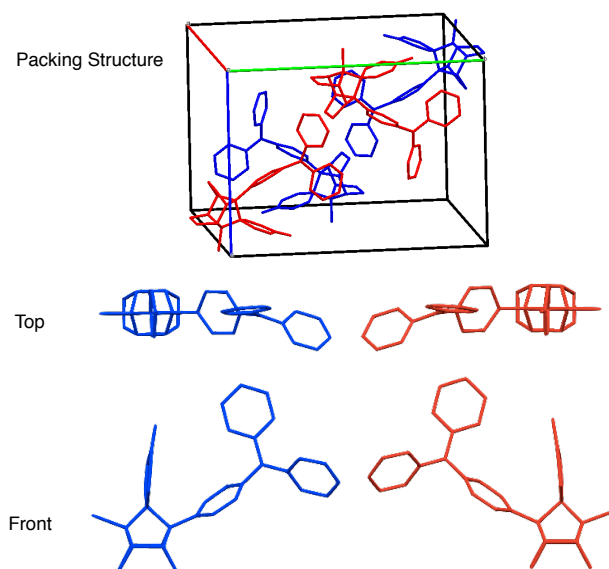

**Fig. S3** Packing structure and molecular structure of **4** in the crystalline state.

## 4. Cyclic Voltammogram

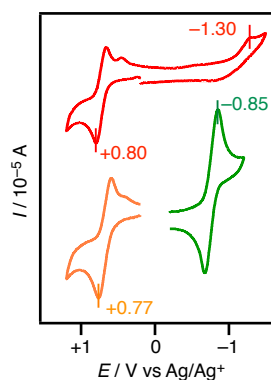

**Fig. S4** Cyclic voltammograms of **4** (red), TPA-<sup>t</sup>Bu, (orange) and benzoquinone (green) in CH<sub>2</sub>Cl<sub>2</sub> containing 0.1 M *n*-Bu<sub>4</sub>N<sup>+</sup>BF<sub>4</sub><sup>-</sup>.

Scan rate: 0.1 Vs<sup>-1</sup>, reference electrode: Ag/Ag<sup>+</sup>, working and counter electrodes: Pt.

## 5. NMR Spectra

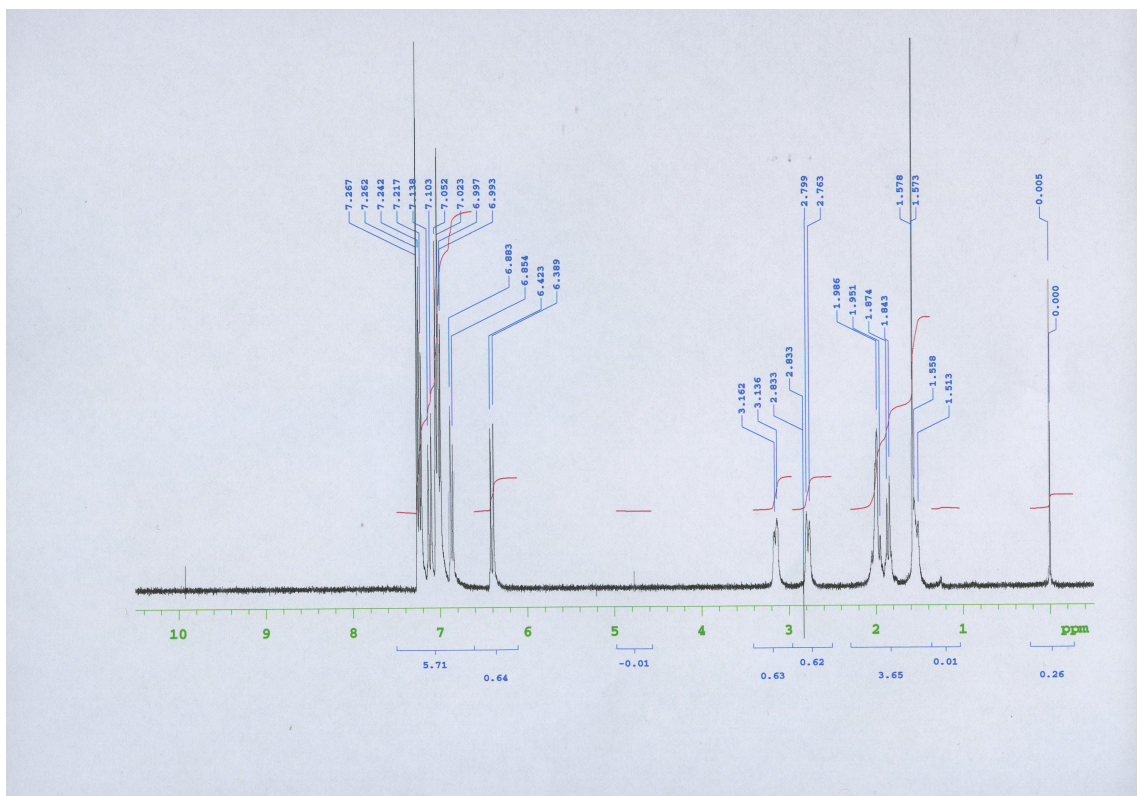

Fig. S5  $^1\text{H}$  NMR spectrum of 4 (300 MHz,  $\text{CDCl}_3$ ).

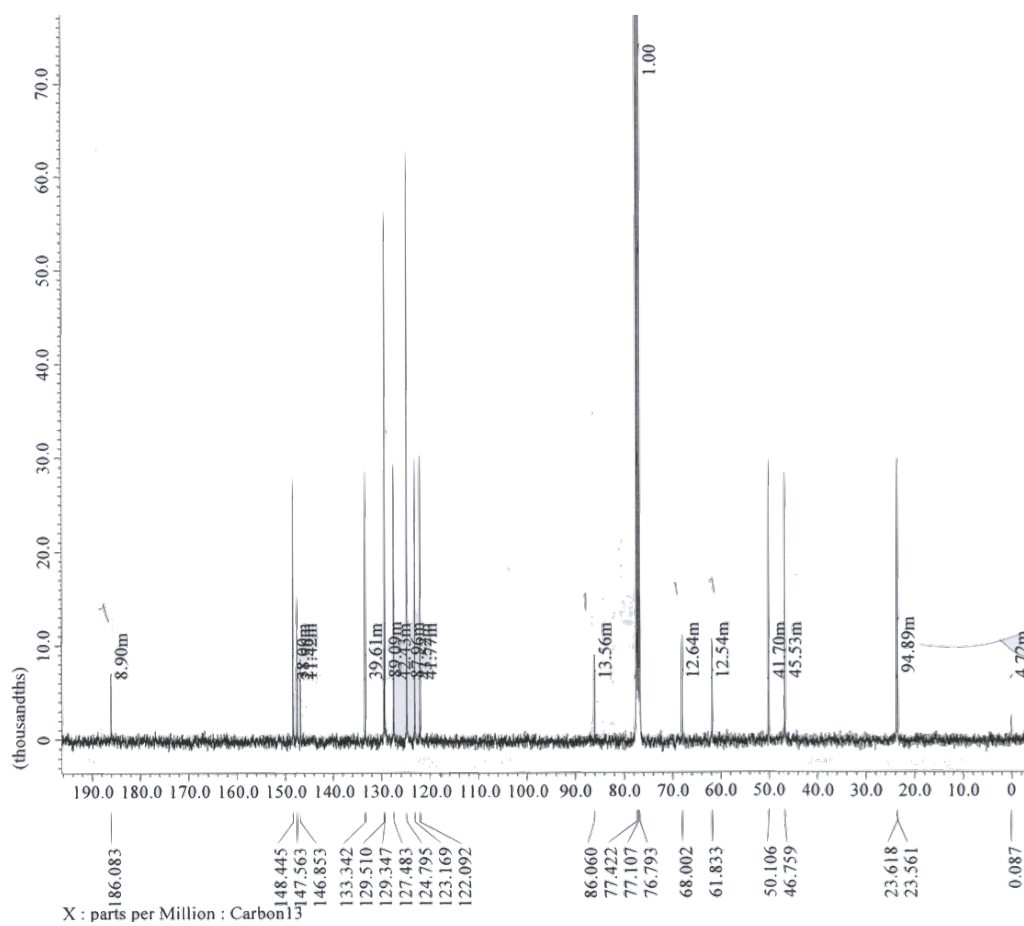

Fig. S6  $^{13}\text{C}$  NMR spectrum of 4 (100 MHz, in  $\text{CDCl}_3$ ).

## 6. Calculated Cartesian Coordinates

Geometry optimizations for **4**, TPA-<sup>t</sup>Bu, **7**, LE-4\*, and ICT-4\* by employing DFT method were performed using Gaussian 09 with the B3LYP functional and 6-31G\* basis set. No imaginary frequencies were found. Cartesian coordinates for optimized geometries of **4**, TPA-<sup>t</sup>Bu, **7**, LE-4\*, and ICT-4\* were given in Tables S2, S3, S4, S5, and S6, respectively.

**Table S2** The Cartesian Coordinates of **4** Optimized at the B3LYP/6-31G\* Level

| Atom | Coordinates / Å |          |          |
|------|-----------------|----------|----------|
|      | X               | Y        | Z        |
| C    | 2.15538         | -0.62506 | -0.21439 |
| C    | 2.92807         | 0.67362  | 0.29102  |
| C    | 0.64070         | -0.53912 | -0.18735 |
| C    | 2.80036         | -0.95210 | -1.60856 |
| C    | 2.80969         | -1.80769 | 0.58266  |
| C    | 2.67492         | 1.87431  | -0.57344 |
| C    | 2.66440         | 0.95602  | 1.74185  |
| C    | 4.30762         | 0.01454  | 0.02689  |
| C    | 4.31504         | -1.35098 | 0.75672  |
| C    | 4.30485         | -0.49248 | -1.43749 |
| Cl   | 5.73600         | 1.05880  | 0.43028  |
| H    | 4.55681         | -1.25659 | 1.81807  |
| C    | 5.39410         | -2.15877 | 0.00667  |
| H    | 4.53884         | 0.29783  | -2.15478 |
| C    | 5.38786         | -1.59112 | -1.44330 |
| H    | 2.37631         | -1.95476 | 1.57428  |
| C    | 2.54762         | -3.03029 | -0.32003 |
| H    | 2.35070         | -0.39224 | -2.43166 |
| C    | 2.53773         | -2.46351 | -1.76878 |
| H    | 6.36490         | -1.98159 | 0.47926  |
| H    | 5.21872         | -3.23680 | 0.04786  |
| H    | 6.35561         | -1.13744 | -1.67723 |
| H    | 5.20893         | -2.35563 | -2.20371 |
| H    | 1.56983         | -3.45515 | -0.07143 |
| H    | 3.27962         | -3.82915 | -0.17558 |
| H    | 1.55234         | -2.60402 | -2.22474 |
| H    | 3.25850         | -2.95408 | -2.42826 |
| C    | -0.06685        | 0.11554  | -1.20946 |
| C    | -0.11983        | -1.06092 | 0.87052  |
| C    | -1.50613        | -0.94023 | 0.91206  |
| C    | -1.45256        | 0.23274  | -1.18885 |
| C    | -2.19892        | -0.29252 | -0.12187 |
| H    | 0.37027         | -1.56275 | 1.69854  |
| H    | -2.05784        | -1.34672 | 1.75348  |
| H    | 0.46805         | 0.54287  | -2.05173 |
| H    | -1.96437        | 0.73565  | -2.00286 |
| N    | -3.60987        | -0.16754 | -0.09043 |
| C    | -4.41572        | -1.24044 | 0.38040  |
| C    | -4.22623        | 1.03961  | -0.52869 |
| C    | -3.70452        | 2.28531  | -0.14575 |
| C    | -5.36559        | 0.99889  | -1.34756 |
| C    | -5.97254        | 2.18204  | -1.76502 |
| C    | -4.30724        | 3.46324  | -0.58379 |
| C    | -5.44616        | 3.42028  | -1.39088 |
| H    | -5.77000        | 0.03836  | -1.65115 |
| H    | -6.85463        | 2.13319  | -2.39825 |
| H    | -2.82836        | 2.32445  | 0.49380  |
| H    | -3.89014        | 4.41901  | -0.27790 |
| H    | -5.91788        | 4.34046  | -1.72368 |
| C    | -5.51998        | -0.99027 | 1.21105  |
| C    | -4.12537        | -2.56535 | 0.01599  |

|   |          |          |          |
|---|----------|----------|----------|
| C | -4.91681 | -3.61301 | 0.48286  |
| C | -6.31639 | -2.04301 | 1.65767  |
| C | -6.01902 | -3.36039 | 1.30229  |
| H | -3.27999 | -2.76607 | -0.63451 |
| H | -4.67746 | -4.63203 | 0.18980  |
| H | -5.74809 | 0.03039  | 1.50101  |
| H | -7.16717 | -1.83051 | 2.29985  |
| H | -6.63826 | -4.17877 | 1.65829  |
| H | 2.87397  | 0.15550  | 2.44590  |
| C | 2.17306  | 2.11562  | 2.20374  |
| H | 2.89933  | 1.77612  | -1.63216 |
| C | 2.18825  | 3.03836  | -0.11773 |
| H | 1.97926  | 2.27328  | 3.26116  |
| H | 2.00924  | 3.88128  | -0.77957 |
| C | 1.87132  | 3.25141  | 1.30923  |
| O | 1.39721  | 4.30542  | 1.72435  |

**Table S3** The Cartesian Coordinates of TPA-<sup>t</sup>Bu Optimized at the B3LYP/6-31G\* Level

| Atom | Coordinates / Å |          |          |
|------|-----------------|----------|----------|
|      | X               | Y        | Z        |
| C    | -0.00323        | -0.01689 | -0.06425 |
| N    | 1.20715         | 0.13631  | 0.66443  |
| C    | -1.01422        | 0.95513  | 0.01423  |
| C    | -0.20951        | -1.14635 | -0.87352 |
| C    | -1.40226        | -1.29982 | -1.57743 |
| C    | -2.19616        | 0.80125  | -0.70783 |
| C    | -2.40173        | -0.32717 | -1.50443 |
| H    | 0.56892         | -1.89931 | -0.94460 |
| H    | -1.54313        | -2.18075 | -2.19851 |
| H    | -0.86709        | 1.82772  | 0.64262  |
| H    | -2.96704        | 1.56406  | -0.63386 |
| H    | -3.32737        | -0.44696 | -2.06017 |
| C    | 1.83334         | 1.40839  | 0.75332  |
| C    | 1.78546         | -0.98615 | 1.31947  |
| C    | 0.99268         | -1.88827 | 2.03892  |
| C    | 3.16811         | -1.22134 | 1.25940  |
| C    | 3.72606         | -2.31822 | 1.90706  |
| C    | 1.56501         | -2.99407 | 2.66802  |
| C    | 2.94417         | -3.23961 | 2.62603  |
| H    | 3.80268         | -0.53877 | 0.70252  |
| H    | 4.80098         | -2.46219 | 1.83395  |
| H    | -0.07858        | -1.72455 | 2.10421  |
| H    | 0.90745         | -3.66366 | 3.21176  |
| C    | 3.60557         | -4.44576 | 3.31540  |
| C    | 2.40254         | 1.84102  | 1.96250  |
| C    | 1.89666         | 2.25394  | -0.36682 |
| C    | 2.50635         | 3.50328  | -0.27215 |
| C    | 3.02614         | 3.08475  | 2.04192  |
| C    | 3.07912         | 3.92670  | 0.92916  |
| H    | 1.46618         | 1.92550  | -1.30743 |
| H    | 2.54538         | 4.14317  | -1.15001 |
| H    | 2.35224         | 1.19743  | 2.83494  |
| H    | 3.46046         | 3.40179  | 2.98664  |

|   |         |          |         |
|---|---------|----------|---------|
| H | 3.55968 | 4.89852  | 0.99704 |
| C | 4.31510 | -5.32068 | 2.25430 |
| C | 4.64735 | -3.94683 | 4.34478 |
| C | 2.58375 | -5.32746 | 4.05801 |
| H | 3.59859 | -5.69929 | 1.51633 |
| H | 5.08569 | -4.76062 | 1.71409 |
| H | 4.80077 | -6.18187 | 2.72979 |
| H | 5.42985 | -3.34351 | 3.87275 |
| H | 4.17090 | -3.33147 | 5.11652 |
| H | 5.13428 | -4.79642 | 4.83934 |
| H | 2.06440 | -4.77278 | 4.84790 |
| H | 1.83026 | -5.74046 | 3.37769 |
| H | 3.09881 | -6.17110 | 4.53111 |

**Table S4** The Cartesian Coordinates of 7 Optimized at the B3LYP/6-31G\* Level

| Atom | Coordinates / Å |          |          |
|------|-----------------|----------|----------|
|      | X               | Y        | Z        |
| C    | 2.11355         | -0.61884 | -0.25103 |
| C    | 2.87662         | 0.57226  | 0.45142  |
| C    | 2.80301         | -0.77611 | -1.64626 |
| C    | 2.68703         | -1.91498 | 0.41072  |
| C    | 2.67944         | 1.87967  | -0.26171 |
| C    | 2.55659         | 0.67433  | 1.91562  |
| C    | 4.25566         | -0.08192 | 0.16704  |
| C    | 4.19501         | -1.53276 | 0.71132  |
| C    | 4.31134         | -0.39060 | -1.35167 |
| Cl   | 5.68477         | 0.85889  | 0.76849  |
| H    | 4.38893         | -1.58479 | 1.78536  |
| C    | 5.29066         | -2.26449 | -0.09151 |
| H    | 4.59931         | 0.48052  | -1.94504 |
| C    | 5.36739         | -1.51085 | -1.45282 |
| H    | 2.18078         | -2.16802 | 1.34760  |
| C    | 2.44472         | -3.00028 | -0.65946 |
| H    | 2.39198         | -0.09444 | -2.39755 |
| C    | 2.52145         | -2.24662 | -2.02067 |
| H    | 6.24149         | -2.17842 | 0.44281  |
| H    | 5.09052         | -3.33326 | -0.20231 |
| H    | 6.35552         | -1.05868 | -1.57988 |
| H    | 5.20956         | -2.16352 | -2.31521 |
| H    | 1.44995         | -3.43546 | -0.51554 |
| H    | 3.15199         | -3.83081 | -0.59110 |
| H    | 1.56463         | -2.30897 | -2.55007 |
| H    | 3.27074         | -2.66429 | -2.69803 |
| H    | 2.71624         | -0.21554 | 2.51852  |
| C    | 2.07975         | 1.78124  | 2.50553  |
| H    | 2.93273         | 1.90832  | -1.31806 |
| C    | 2.20295         | 2.98999  | 0.32202  |
| H    | 1.84984         | 1.80937  | 3.56717  |
| H    | 2.06430         | 3.91344  | -0.23364 |
| C    | 1.84736         | 3.03254  | 1.75531  |
| O    | 1.39424         | 4.04153  | 2.28831  |
| C    | 0.59496         | -0.49888 | -0.27023 |
| H    | 0.19190         | -0.44777 | 0.74734  |
| H    | 0.27903         | 0.40788  | -0.79798 |
| H    | 0.12947         | -1.35490 | -0.77046 |

**Table S5** The Cartesian Coordinates of LE-4\* Optimized at the TD-B3LYP/6-31G\* Level

| Atom | Coordinates / Å |          |          |
|------|-----------------|----------|----------|
|      | X               | Y        | Z        |
| C    | 2.11279         | -0.69861 | -0.10835 |
| C    | 2.86737         | 0.68033  | 0.17403  |
| C    | 0.60532         | -0.60562 | -0.10083 |
| C    | 2.73197         | -1.25333 | -1.43736 |
| C    | 2.75721         | -1.74610 | 0.85856  |
| C    | 2.62293         | 1.75396  | -0.86274 |
| C    | 2.61198         | 1.22559  | 1.56236  |
| C    | 4.24676         | -0.03569 | 0.01207  |
| C    | 4.26259         | -1.26031 | 0.95310  |
| C    | 4.23958         | -0.77692 | -1.34697 |
| Cl   | 5.69465         | 1.03386  | 0.22311  |
| H    | 4.49707         | -0.98744 | 1.98417  |
| C    | 5.33855         | -2.18316 | 0.34642  |
| H    | 4.46675         | -0.11269 | -2.18335 |
| C    | 5.31415         | -1.87284 | -1.18110 |
| H    | 2.33519         | -1.73032 | 1.86671  |
| C    | 2.50464         | -3.10266 | 0.16404  |
| H    | 2.27935         | -0.82417 | -2.33519 |
| C    | 2.46810         | -2.77098 | -1.35704 |
| H    | 6.31123         | -1.91442 | 0.76959  |
| H    | 5.18104         | -3.24151 | 0.57410  |
| H    | 6.28104         | -1.47169 | -1.49989 |
| H    | 5.12593         | -2.75790 | -1.79605 |
| H    | 1.53932         | -3.50886 | 0.48990  |
| H    | 3.25277         | -3.85856 | 0.41718  |
| H    | 1.47484         | -2.98470 | -1.77083 |
| H    | 3.17643         | -3.36430 | -1.94202 |
| C    | -0.07276        | 0.02696  | -1.16291 |
| C    | -0.17764        | -1.08999 | 0.96315  |
| C    | -1.56255        | -0.96656 | 0.97466  |
| C    | -1.45394        | 0.17154  | -1.16586 |
| C    | -2.20404        | -0.33004 | -0.09438 |
| H    | 0.30278         | -1.55897 | 1.81254  |
| H    | -2.13975        | -1.32653 | 1.82077  |
| H    | 0.49661         | 0.43541  | -1.98634 |
| H    | -1.95247        | 0.65933  | -1.99772 |
| N    | -3.63188        | -0.16273 | -0.07821 |
| C    | -4.45243        | -1.26572 | 0.20584  |
| C    | -4.16597        | 1.11122  | -0.32060 |
| C    | -3.44402        | 2.26096  | 0.07789  |
| C    | -5.40576        | 1.25408  | -0.98726 |
| C    | -5.91002        | 2.52213  | -1.23444 |
| C    | -3.96746        | 3.52012  | -0.17371 |
| C    | -5.19843        | 3.65815  | -0.82765 |
| H    | -5.93188        | 0.37400  | -1.33937 |
| H    | -6.85094        | 2.62962  | -1.76468 |
| H    | -2.49924        | 2.15387  | 0.59655  |
| H    | -3.41458        | 4.39689  | 0.14552  |
| H    | -5.59753        | 4.64738  | -1.02739 |
| C    | -5.64237        | -1.10257 | 0.94953  |
| C    | -4.07090        | -2.55268 | -0.23232 |
| C    | -4.87903        | -3.64372 | 0.05371  |
| C    | -6.43518        | -2.20668 | 1.23195  |
| C    | -6.06205        | -3.47872 | 0.78414  |

|   |          |          |          |   |          |          |          |
|---|----------|----------|----------|---|----------|----------|----------|
| H | -3.16308 | -2.67154 | -0.81164 | H | -2.10849 | -3.18021 | 1.80249  |
| H | -4.59099 | -4.62828 | -0.30035 | H | -3.85945 | -3.24846 | 1.81654  |
| H | -5.90754 | -0.12270 | 1.32988  | C | -0.00886 | -0.47636 | 1.36239  |
| H | -7.33841 | -2.07900 | 1.82004  | C | 0.08374  | -1.31919 | -0.88551 |
| H | -6.68546 | -4.33811 | 1.00929  | C | 1.47103  | -1.19954 | -0.88716 |
| H | 2.79915  | 0.55932  | 2.40177  | C | 1.37373  | -0.33143 | 1.37371  |
| C | 2.19649  | 2.50018  | 1.80850  | C | 2.10796  | -0.66274 | 0.23320  |
| H | 2.85042  | 1.50970  | -1.89859 | H | -0.40069 | -1.67929 | -1.78458 |
| C | 2.21399  | 3.02208  | -0.55656 | H | 2.04440  | -1.44749 | -1.77537 |
| H | 2.04616  | 2.82212  | 2.83841  | H | -0.56817 | -0.17149 | 2.23674  |
| H | 2.08865  | 3.74887  | -1.35856 | H | 1.87709  | 0.07742  | 2.24457  |
| C | 1.95445  | 3.50378  | 0.78549  | N | 3.50548  | -0.29575 | 0.16073  |
| O | 1.56440  | 4.68745  | 1.04475  | C | 4.46841  | -1.27532 | -0.11252 |

**Table S6** The Cartesian Coordinates of ICT-4\* Optimized at the TD-B3LYP/6-31G\* Level

| Atom | Coordinates / Å |          |          |   |          |          |          |
|------|-----------------|----------|----------|---|----------|----------|----------|
|      | X               | Y        | Z        |   |          |          |          |
| C    | -2.19698        | -0.80525 | 0.13741  | C | 3.80305  | 1.06577  | 0.29421  |
| C    | -2.68302        | 0.69115  | -0.17973 | C | 2.81888  | 2.02992  | -0.04759 |
| C    | -0.69335        | -0.91889 | 0.21592  | C | 5.05012  | 1.49361  | 0.81900  |
| C    | -3.00212        | -1.24780 | 1.40272  | C | 5.29158  | 2.84830  | 0.97936  |
| C    | -2.93390        | -1.71349 | -0.89836 | C | 3.07327  | 3.38049  | 0.12400  |
| C    | -2.31638        | 1.69289  | 0.89105  | C | 4.31227  | 3.79412  | 0.63331  |
| C    | -2.22289        | 1.18662  | -1.53189 | H | 5.78297  | 0.76202  | 1.14006  |
| C    | -4.16534        | 0.22807  | -0.13099 | H | 6.23722  | 3.17481  | 1.40114  |
| C    | -4.32320        | -0.97457 | -1.09078 | H | 1.86496  | 1.73023  | -0.45842 |
| C    | -4.39118        | -0.50929 | 1.21193  | H | 2.27848  | 4.07399  | -0.13591 |
| Cl   | -5.38767        | 1.53663  | -0.43286 | H | 4.51465  | 4.85148  | 0.77336  |
| H    | -4.43443        | -0.66395 | -2.13196 | C | 5.61080  | -0.97605 | -0.88787 |
| C    | -5.58356        | -1.70060 | -0.57798 | C | 4.27203  | -2.59016 | 0.36308  |
| H    | -4.56067        | 0.17921  | 2.04262  | C | 5.21706  | -3.56926 | 0.09265  |
| C    | -5.62827        | -1.39306 | 0.94903  | C | 6.54323  | -1.97021 | -1.15350 |
| H    | -2.43923        | -1.76107 | -1.87130 | C | 6.35672  | -3.26655 | -0.66228 |
| C    | -2.96454        | -3.09719 | -0.21601 | H | 3.39296  | -2.81490 | 0.95563  |
| H    | -2.55588        | -0.91223 | 2.34207  | H | 5.06905  | -4.57403 | 0.47550  |
| C    | -3.00649        | -2.78846 | 1.30977  | H | 5.73139  | 0.01676  | -1.30578 |
| H    | -6.46281        | -1.27874 | -1.07439 | H | 7.41027  | -1.73838 | -1.76409 |
| H    | -5.58362        | -2.77131 | -0.80165 | H | 7.08846  | -4.03921 | -0.87592 |
| H    | -6.52968        | -0.82259 | 1.19277  | H | -2.59039 | 0.66397  | -2.41167 |
| H    | -5.65230        | -2.29439 | 1.56829  | C | -1.36508 | 2.23568  | -1.69079 |
| H    | -2.04841        | -3.64504 | -0.46785 | H | -2.76813 | 1.57007  | 1.87268  |
| H    | -3.79623        | -3.72400 | -0.54951 | C | -1.45872 | 2.73475  | 0.67882  |
|      |                 |          |          | H | -1.04697 | 2.52084  | -2.69276 |
|      |                 |          |          | H | -1.21760 | 3.40565  | 1.50257  |
|      |                 |          |          | C | -0.86095 | 3.05063  | -0.60215 |
|      |                 |          |          | O | 0.01111  | 3.97605  | -0.76639 |

## 7. Results of TD-DFT Calculations

**Table S7.** Major Electronic Transitions of **4** and its Component (HOMO: 133, LUMO: 134)

| Wavelength / nm | $f$    | Orbitals  | CI Coefficient |
|-----------------|--------|-----------|----------------|
| 423             | 0.0180 | 133 → 134 | 0.70550        |
| 319             | 0.0155 | 133 → 135 | 0.55186        |
|                 |        | 133 → 136 | -0.41964       |
| 310             | 0.4124 | 133 → 135 | 0.42419        |
|                 |        | 133 → 136 | 0.55512        |
| 300             | 0.2101 | 133 → 137 | 0.69200        |
| 237             | 0.1032 | 123 → 134 | -0.13073       |
|                 |        | 126 → 134 | 0.44207        |
|                 |        | 129 → 134 | 0.12791        |
|                 |        | 132 → 135 | -0.28426       |
|                 |        | 132 → 136 | 0.16892        |
|                 |        | 132 → 138 | -0.27953       |
|                 |        | 132 → 140 | 0.15375        |
|                 |        | 133 → 141 | 0.12206        |
|                 |        | 133 → 142 | -0.10115       |

**Table S8.** Major Electronic Transitions of TPA-<sup>t</sup>Bu and its Component (HOMO: 81, LUMO: 82)

| Wavelength / nm | $f$    | Orbitals | CI Coefficient |
|-----------------|--------|----------|----------------|
| 318             | 0.0161 | 81 → 82  | 0.68692        |
|                 |        | 81 → 84  | -0.11761       |
| 303             | 0.3114 | 81 → 83  | -0.43108       |
|                 |        | 81 → 84  | 0.54300        |
| 302             | 0.2674 | 81 → 83  | 0.54733        |
|                 |        | 81 → 84  | 0.42186        |

**Table S9.** Major Electronic Transitions of **7** and its Component (HOMO: 73, LUMO: 74)

| Wavelength / nm | $f$    | Orbitals | CI Coefficient |
|-----------------|--------|----------|----------------|
| 379             | 0.0000 | 73 → 74  | 0.70327        |
| 247             | 0.0111 | 71 → 74  | 0.69864        |
| 241             | 0.2791 | 69 → 74  | -0.22192       |
|                 |        | 71 → 75  | 0.17381        |
|                 |        | 71 → 74  | 0.64326        |

(EOF)
